# Supplementary material for: Identification of fibrinogen as a natural inhibitor of MMP-2
Source: PubMed Central journal article supplement (PMC6416301; doi:10.1038/s41598-019-40983-y), 2019-03-13
Supplement: 41598_2019_40983_MOESM1_ESM.pdf [file 41598_2019_40983_MOESM1_ESM.pdf]

**Identification of fibrinogen as a natural inhibitor of MMP-2**

**Authors:**

Hassan Sarker (1), Eugenio Hardy (1, 2), Ayman Haimour (1), Walter P. Maksymowych (3), Lorenzo D. Botto (4), Carlos Fernandez-Patron (1\*)

**Authors' affiliations:**

(1): Department of Biochemistry, Faculty of Medicine and Dentistry, University of Alberta, Edmonton, AB T6G 2H7, Canada.

(2): Biotechnology Laboratory, Study Center for Research and Biological Evaluations, Institute of Pharmacy and Foods, University of Havana, Havana, P.O. Box 13600, Cuba.

(3): Department of Medicine, Faculty of Medicine and Dentistry, University of Alberta, Edmonton, AB T6G 2H7, Canada.

(4): Departments of Pediatrics, Division of Medical Genetics and Pediatrics, University of Utah, Salt Lake City, UT 84108, USA.

**(\*): Correspondence:**

Carlos Fernandez-Patron: cf2@ualberta.ca

Department of Biochemistry

Faculty of Medicine and Dentistry

University of Alberta

Edmonton, AB T6G 2H7, Canada

**Running title:** Fibrinogen inhibits MMP-2

**Key words:** Matrix metalloproteinase, MMP-2, Fibrinogen, MMP-2 deficiency

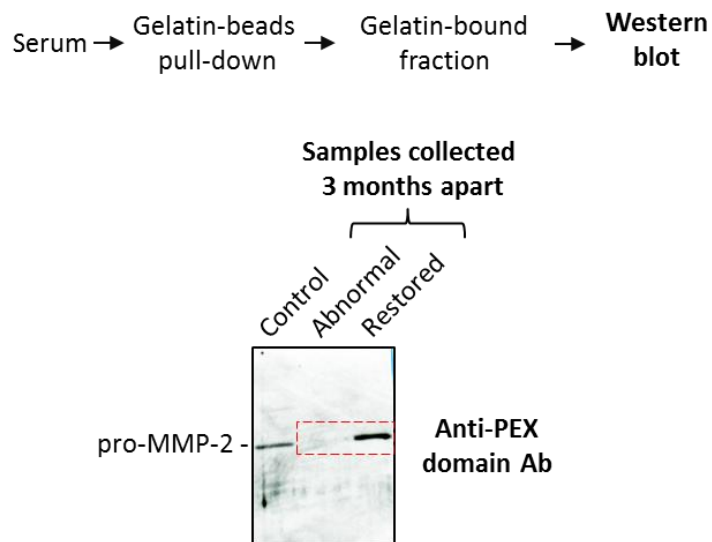

**Figure S1: Restoration of binding of serum MMP-2 to gelatin when serum fibrinogen levels normalized.** Western blot (using the anti-PEX domain antibody) showing MMP-2 in the gelatin-bound fraction indicating the restoration of binding of MMP-2 to gelatin in a second serum sample from the donor of the abnormal serum collected three months after the first collection. PEX, hemopexin-like domain; Ab, antibody.

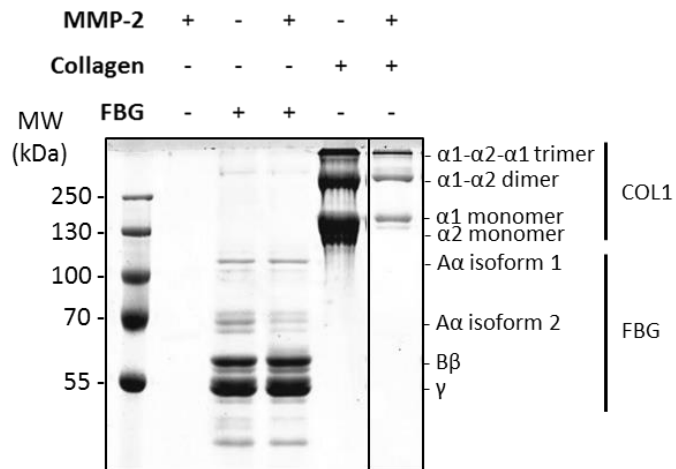

**Figure S2: Cleavage of purified collagen type I and FBG by MMP-2.** SDS-PAGE of fibrinogen (50 μg) and collagen type I (50 μg) degradation by recombinant MMP-2 (12 nM) after incubation for 24 hours at 37°C.

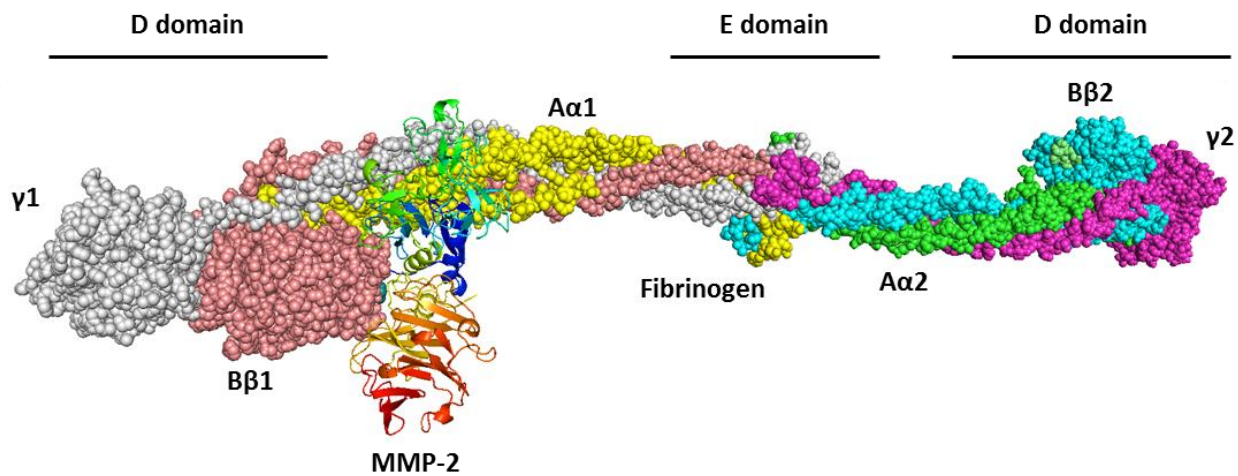

**Fig. S3: Molecular docking of FBG and MMP-2.** Whole annotated image of molecular interactions between MMP-2 and FBG presented in Fig. 7a.

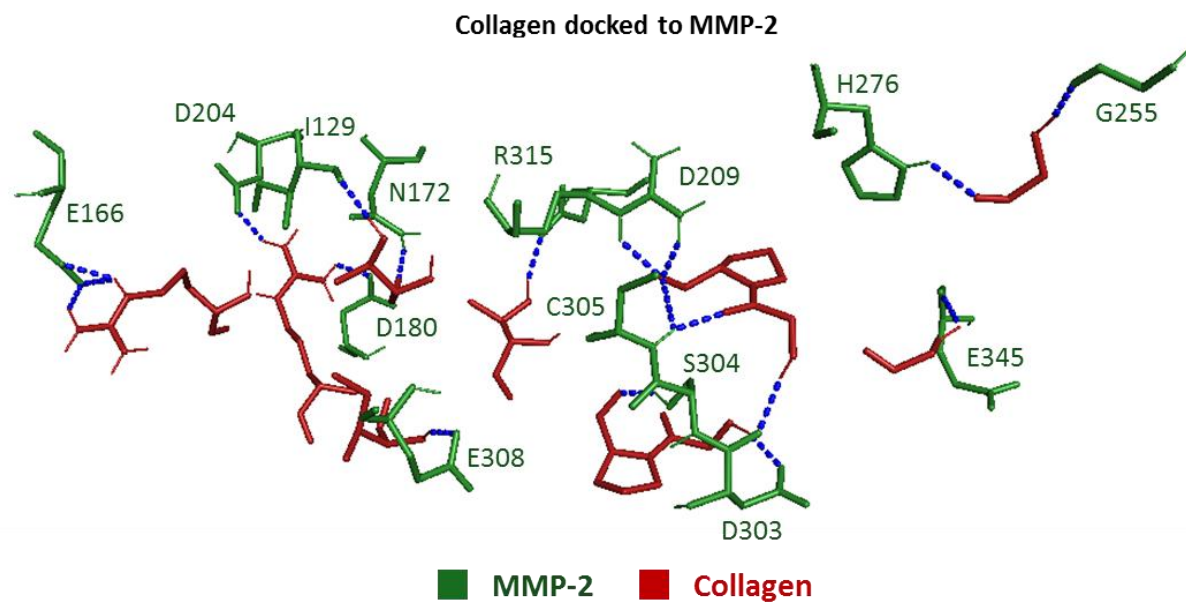

**Figure S4: Molecular docking of collagen to MMP-2.** Labelled residues of MMP-2 (green) that form hydrogen bonds (blue dotted lines) with collagen residues (red) are presented. Interacting MMP-2 residues span over the catalytic domain and the fibronectin type II repeats 1,2 and 3.

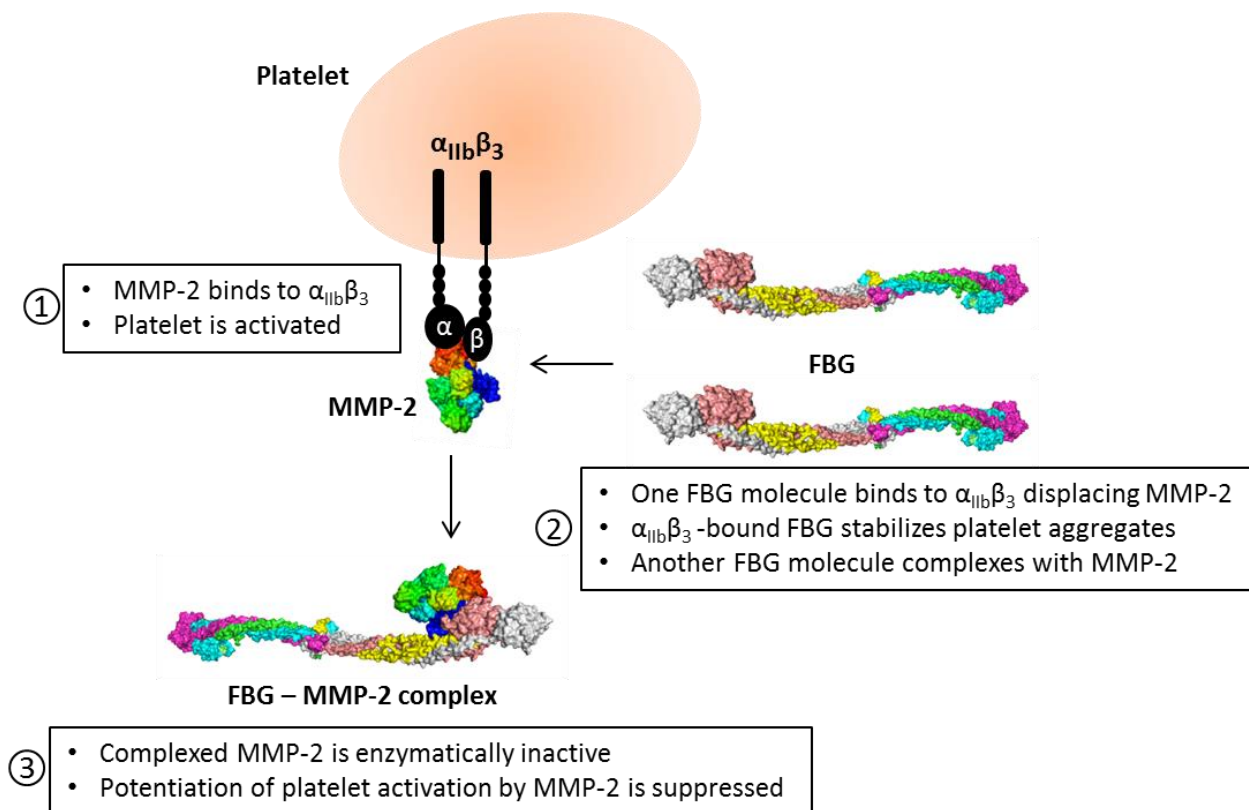

**Figure S5: Illustration of a hypothesized anti-aggregatory function of FBG-mediated inhibition of MMP-2 activity.**

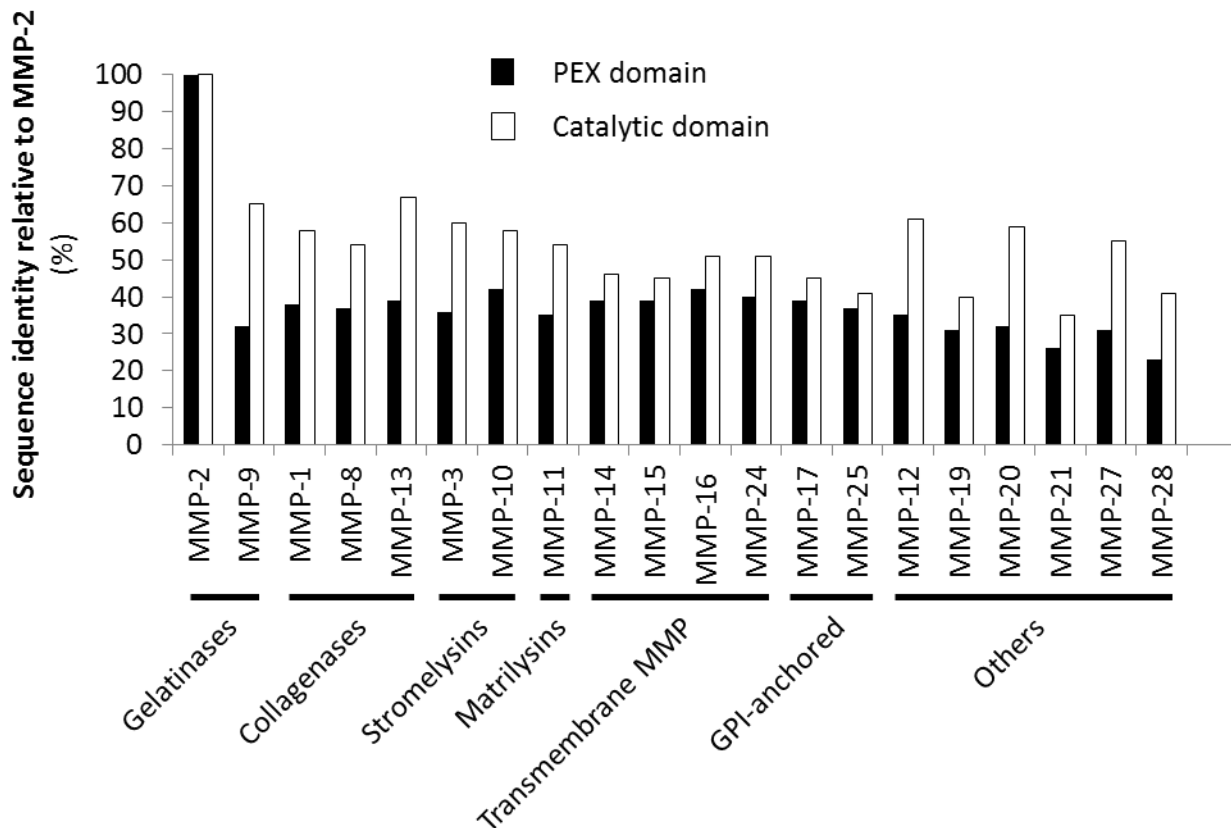

**Figure S6: Comparison of amino acid sequence similarity of MMPs relative to MMP-2.** The amino acid sequences of catalytic and the hemopexin-like domains of MMPs were aligned with MMP-2. The data is presented as percent identity relative to MMP-2.

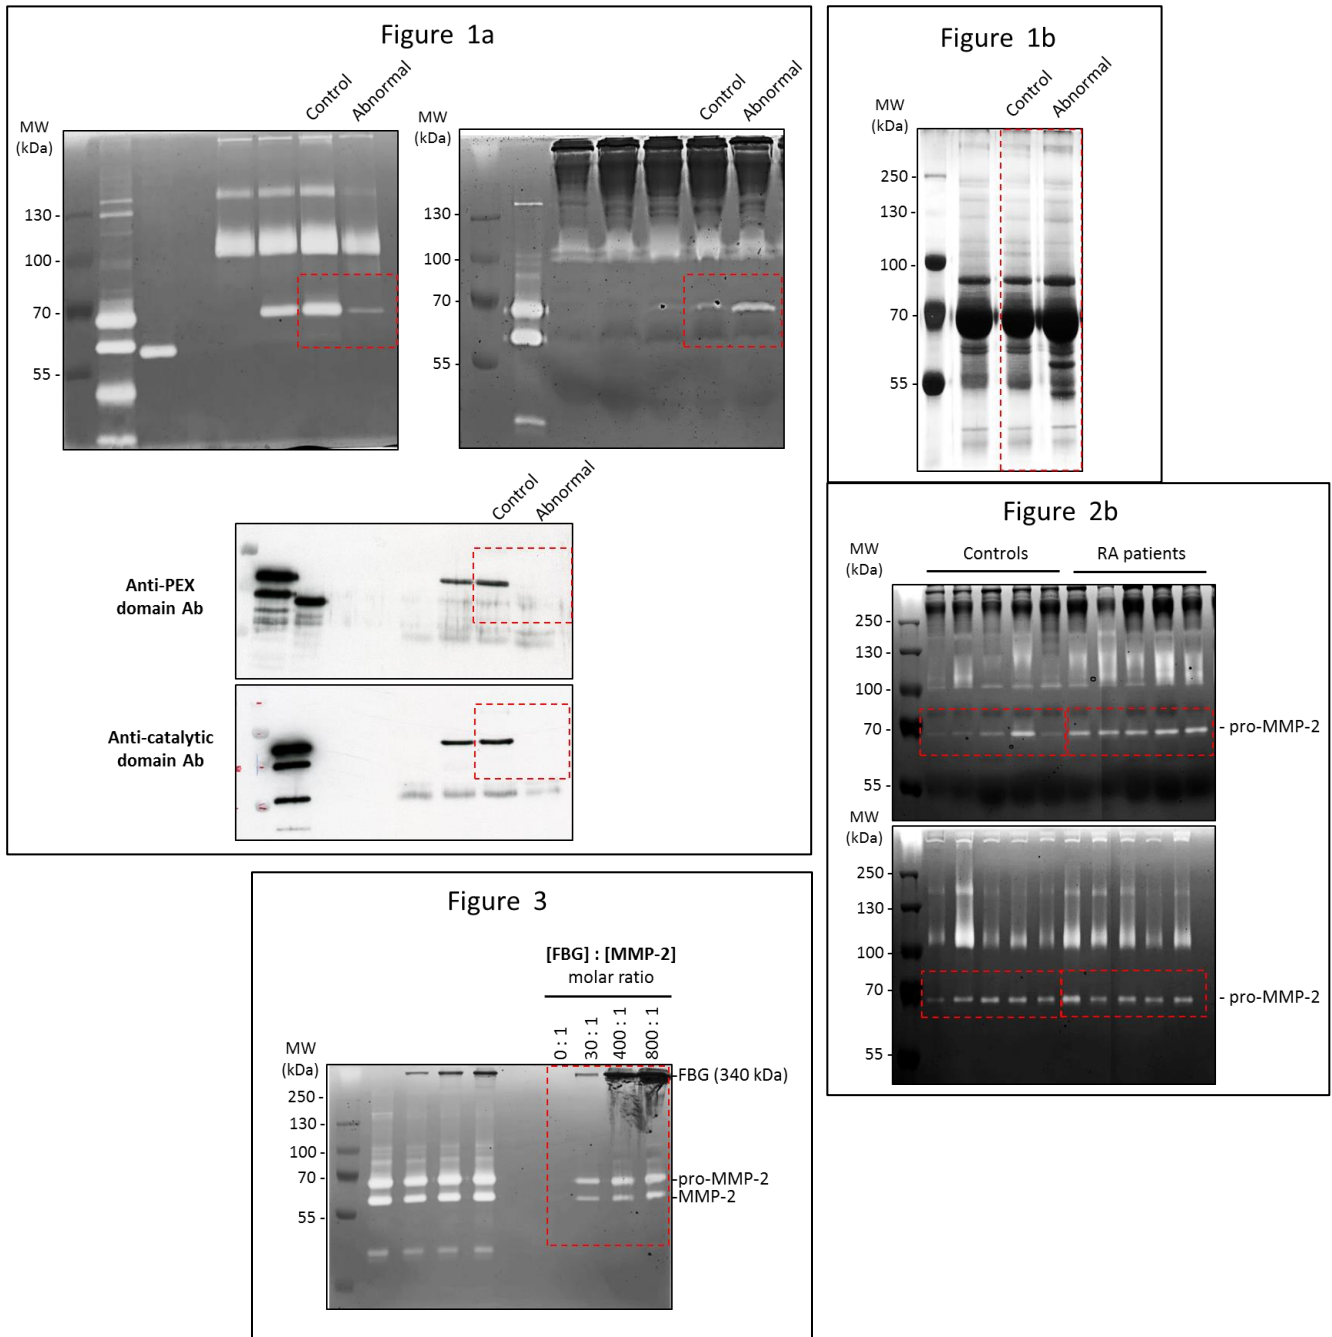

Figure S7: Full length gels and blots for figures 1a, 1b, 2b and 3.



| Denotation    | Condition    | Age | Sex | Denotation | Condition | Age | Sex |
|---------------|--------------|-----|-----|------------|-----------|-----|-----|
| C1 (abnormal) | Asymptomatic | 30  | M   | R4         | RA        | 70  | F   |
| C2            | Control      | 69  | F   | R5         | RA        | 76  | F   |
| C3            | Control      | 41  | M   | R6         | RA        | 36  | F   |
| C4            | Control      | 69  | F   | R7         | RA        | 64  | M   |
| C5            | Control      | 60  | M   | R8         | RA        | 68  | F   |
| C6            | Control      | 77  | F   | R9         | RA        | 35  | F   |
| C7            | Control      | 44  | M   | R10        | RA        | 42  | F   |
| C8            | Control      | 35  | F   | R11        | RA        | 40  | M   |
| C9            | Control      | 43  | F   | R12        | RA        | 69  | F   |
| C10           | Control      | 59  | F   | R13        | RA        | 45  | F   |
| C11           | Control      | 42  | F   | R14        | RA        | 34  | F   |
| C12           | Control      | 53  | F   | R15        | RA        | 56  | F   |
| C13           | Control      | 34  | F   | R16        | RA        | 66  | M   |
| C14           | Control      | 37  | F   | R17        | RA        | 57  | F   |
| C15           | Control      | 65  | F   | R18        | RA        | 40  | F   |
| C16           | Control      | 71  | M   | R19        | RA        | 36  | F   |
| C17           | Control      | 36  | F   | R20        | RA        | 66  | F   |
| C18           | Control      | 69  | F   | R21        | RA        | 69  | F   |
| C19           | Control      | 45  | F   | R22        | RA        | 74  | F   |
| C20           | Control      | 67  | F   | R23        | RA        | 44  | M   |
| R1            | RA           | 53  | F   | R24        | RA        | 58  | F   |
| R2            | RA           | 58  | M   | R25        | RA        | 47  | F   |
| R3            | RA           | 38  | F   |            |           |     |     |

**Table S1: Demographic information of the total cohorts of sera donors assessed.**

|                                   | <b>Fibrinogen docked to MMP-2</b>                                                                                                              | <b>Marimastat docked to MMP-2</b>                                                              |
|-----------------------------------|------------------------------------------------------------------------------------------------------------------------------------------------|------------------------------------------------------------------------------------------------|
| <b>Hydrogen bonds</b>             | Y110, N111, E166, A167, E177,<br>G181, Y182, P183, L190, A192,<br>G200, D204, H407, E412, H413,<br>S414, Q415, P423                            | H413, P423                                                                                     |
| <b>Other interacting residues</b> | F112, F113, P114, R115, R127,<br>D164, G165, D168, I169, M170,<br>H178, G179, D180, F184, D185,<br>G189, L191, H193, V201, T311,<br>I424, Y425 | F184, G189, L190, A192, H193,<br>A194, L399, V400, H403, H407,<br>L420, A422, I424, Y425, T426 |
| <b>Target domain(s) of MMP-2</b>  | Catalytic<br>Fibronectin type II repeat 2                                                                                                      | Catalytic                                                                                      |

**Table S2: A comparison of MMP-2 residues interacting (within 5Å) with FBG and Marimastat.**

| <b>Collagen docked to MMP-2</b>   |                                                                                                                                                                                 |
|-----------------------------------|---------------------------------------------------------------------------------------------------------------------------------------------------------------------------------|
| <b>Hydrogen bonds</b>             | I129, E166, N172, D180, D204,<br>D209, G255, H276, D303, S304,<br>C305, E308, R315, E345                                                                                        |
| <b>Other interacting residues</b> | R127, G130, Y131, T132, P133,<br>G165, M170, F173, H178, G200,<br>V201, A278, C291, F293, S301,<br>Y302, T306, T307, G309, R310,<br>D312, G313, T335, S344, G346,<br>A347, K386 |
| <b>Target domain(s) of MMP-2</b>  | Catalytic<br>Fibronectin type II repeat 1<br>Fibronectin type II repeat 2<br>Fibronectin type II repeat 3                                                                       |

**Table S3: A comparison of MMP-2 residues interacting (within 5Å) with collagen in the presence or absence of FBG.**
